# Supplementary material for: Microbial Contamination and Antibiotic Resistance in Marketed Food in Bangladesh: Current Situation and Possible Improvements
Source: MDPI journal article supplement (doi:10.3390/antibiotics12030555), 2023-03-10
Supplement: s1 [file s1]

Questionnaire number:

## Vendor Questionnaire – Bangladesh Food Safety

☐ **Consent provided to participate in study (*attach signed consent form*).**

### 1. Name and contact information for the respondent (vendor)

|      |                        |  |     |       |        |                  |
|------|------------------------|--|-----|-------|--------|------------------|
| 1.1  | Name of interviewer    |  |     | 1.2   | Date   |                  |
| 1.3  | Town                   |  | 1.4 | Thana |        |                  |
| 1.5  | Upazila                |  |     | 1.6   | Market |                  |
| 1.7  | District               |  |     |       | 1.8    | East             |
| 1.9  | GPS North              |  |     |       | 1.10   | Phone (optional) |
| 1.11 | Name of the respondent |  |     | 1.12  |        |                  |

### 2. Basic demography

|      |                                                                                                                                                       |                            |                                          |
|------|-------------------------------------------------------------------------------------------------------------------------------------------------------|----------------------------|------------------------------------------|
| 2.1  | Gender of respondent (1=male, 2=female)                                                                                                               | 2.2                        | Age (1<20, 2=20-35, 3=36-50, 4>51 years) |
| 2.3  | Type of product(s) sold by respondent (1=fresh fish, 2=tomato, 3=broiler 4=other)                                                                     | (if other, please specify) |                                          |
| 2.4  | Does this vendor sell any ready-to-eat products? (1=Yes, 0=No)                                                                                        |                            |                                          |
| 2.5  | (If yes) Please describe which:                                                                                                                       |                            |                                          |
| 2.6  | Years of selling current products in markets                                                                                                          |                            |                                          |
| 2.7  | Highest education completed (0=none, 1=primary, 2=class 5-10, 3=Higher secondary (11-12), 4=Graduation and above, 99=Not asked or not able to assess) |                            |                                          |
| 2.8  | Are you member of a traders association (1=Yes, 0=No)?                                                                                                |                            |                                          |
| 2.8a | (If yes) Give the name of the traders association(s):                                                                                                 |                            |                                          |

### 3. Sales

|     | Complete all that apply for this vendor:                                                                                            | a. Broiler | b. Tomato | c. Pangash<br>frozen solid<br>fresh/on ice<br>(circle 1) |
|-----|-------------------------------------------------------------------------------------------------------------------------------------|------------|-----------|----------------------------------------------------------|
| 3.1 | Approximately how much of these products do you sell in one day (on average)?                                                       | kg/day     | kg/day    | kg/day                                                   |
| 3.2 | In general, from whom do you procure the raw products (1=own production, 2=producer, 3=wholesale market, 4=middleman, 5=other_____) |            |           |                                                          |
| 3.3 | What time in the morning do you usually collect, harvest, or procure the products?                                                  | am/pm      | am/pm     | am/pm                                                    |
| 3.4 | What time do you usually open the stall?                                                                                            | am/pm      | am/pm     | am/pm                                                    |

Questionnaire number:

|      |                                                                                                                                                    |       |       |       |
|------|----------------------------------------------------------------------------------------------------------------------------------------------------|-------|-------|-------|
| 3.5  | What time do you close the stall for the day?                                                                                                      | am/pm | am/pm | am/pm |
| 3.6  | What do you do with the remaining products that you cannot sell? (1=sell to a third party, 2= preserve for the next day, 3= consume, 4=other_____) |       |       |       |
| 3.6a | <b>(If 1)</b> To whom do you sell the products? (1=mobile vendor(s), 2=restaurant, 3=trader, 4=other_____)                                         |       |       |       |

#### 4. Vendor knowledge and attitude towards food safety

|      |                                                                                                                    |                                          |
|------|--------------------------------------------------------------------------------------------------------------------|------------------------------------------|
| 4.1  | Do you think it is possible to get sick from eating this kind of product, in general? (1=Yes, 0=No, 99=don't know) |                                          |
| 4.1a | <b>(If yes)</b> Please mention the diseases you can get:                                                           |                                          |
| 4.2  | Do you worry more about chemicals or germs in food? (1=chemicals, 2=germs, 99=don't know)                          |                                          |
|      | <i>Do you agree with the following:</i>                                                                            | agree=1,<br>disagree=0/<br>Don't know=99 |
| 4.3  | The longer a raw product has been at the market, the lower the quality.                                            |                                          |
| 4.4  | It does not matter how old the food is if you cook it well.                                                        |                                          |
| 4.5  | I can tell by the look and smell of food if it is safe to eat.                                                     |                                          |
| 4.6  | I sometimes eat raw food (such as vegetables) without cooking it first.                                            |                                          |

#### 5. Purchase the product, then make the following vendor observations.

|     |                                                                                                                                             |  |
|-----|---------------------------------------------------------------------------------------------------------------------------------------------|--|
| 5.1 | Is tomato/fish/poultry meat in this stall on ground or elevated? (2=elevated on table, 1=elevated in baskets or bins, 0=directly on ground) |  |
| 5.2 | Is tomato/fish/poultry meat uncovered? (1=Yes, 0=No)                                                                                        |  |
| 5.3 | Is there any cooling? (3=refrigerator, 2=cool box, 1=open to environment, but on ice, 0=No)                                                 |  |
| 5.4 | Are there flies on the food products in this stall? (3=innumerable, 2>10, 1 ≤10, 0=No)                                                      |  |
| 5.5 | Do the tomatoes/fish/poultry meat look clean? (1=Yes, 0=No, there is visible dirt)                                                          |  |
| 5.6 | Do utensils look clean? (1=Yes, 0=No) <i>Circle all that apply: knife, blade, cutting board, scale.</i>                                     |  |
| 5.7 | <i>(Produce only)</i> Are products rinsed, sprayed or wiped during sale? (1=Yes, 0=No)                                                      |  |

Questionnaire number:

## Household Consumer Questionnaire – Bangladesh Food Safety

☐ **Consent provided to participate in study (attach signed consent form).**

|     |                     |  |     |           |  |
|-----|---------------------|--|-----|-----------|--|
| 1.1 | Name of interviewer |  | 1.2 | Date      |  |
| 1.3 | Town                |  | 1.4 | Thana     |  |
| 1.5 | Upazila             |  | 1.6 | District  |  |
| 1.7 | Market              |  | 1.8 | GPS North |  |
| 1.9 | East                |  |     |           |  |

|     |                                                                                         |                            |
|-----|-----------------------------------------------------------------------------------------|----------------------------|
| 7.1 | Type of product(s) purchased by respondent (1=fresh fish, 2=tomato, 3=poultry, 4=other) | (if other, please specify) |
|-----|-----------------------------------------------------------------------------------------|----------------------------|

### 8. Name and contact information for the customer responding

|     |                                                                                                                                                       |  |     |                                          |  |
|-----|-------------------------------------------------------------------------------------------------------------------------------------------------------|--|-----|------------------------------------------|--|
| 8.1 | Name of the customer                                                                                                                                  |  | 8.2 | Phone (optional)                         |  |
| 8.3 | Gender of customer (1=male, 2=female)                                                                                                                 |  | 8.4 | Age (1<20, 2=20-35, 3=36-50, 4>51 years) |  |
| 8.5 | Highest education completed (0=none, 1=primary, 2=class 5-10, 3=higher secondary (11-12), 4=graduation and above, 99=Not asked or not able to assess) |  |     |                                          |  |

### 9. Consumption of circle one: / / product(s)

|     |                                                                                                                                                                                                                            | <span style="border: 1px solid black; padding: 2px;">fish</span> | <span style="border: 1px solid black; padding: 2px;">tomato</span> | <span style="border: 1px solid black; padding: 2px;">poultry</span> |
|-----|----------------------------------------------------------------------------------------------------------------------------------------------------------------------------------------------------------------------------|------------------------------------------------------------------|--------------------------------------------------------------------|---------------------------------------------------------------------|
| 9.1 | What is the total number of people in your household?                                                                                                                                                                      | people                                                           | people                                                             | people                                                              |
| 9.2 | Are there people in your household who do not consume this product?                                                                                                                                                        | people                                                           | people                                                             | people                                                              |
| 9.3 | In grams, how much was consumed in total yesterday (or most recently)?                                                                                                                                                     | g                                                                | g                                                                  | g                                                                   |
| 9.4 | How often do you consume this product?                                                                                                                                                                                     | /week or /month                                                  | /week or /month                                                    | /week or /month                                                     |
| 9.5 | Have you ever eaten this product raw or undercooked? (1=Yes, 0=No)                                                                                                                                                         |                                                                  |                                                                    |                                                                     |
| 9.6 | Which market/retail type do you often go to buy this product?<br>(1= <b>traditional</b> uncovered, open air, roadside or rickshaw, 2= <b>traditional</b> municipal market, 3= <b>modern</b> supermarket/convenience store) |                                                                  |                                                                    |                                                                     |

### 10. Attitudes towards food safety and the market

|  |                                  |                                          |
|--|----------------------------------|------------------------------------------|
|  | Do you agree with the following: | agree=1,<br>disagree=0/<br>Don't know=99 |
|--|----------------------------------|------------------------------------------|

Questionnaire number:

|      |                                                                          |  |
|------|--------------------------------------------------------------------------|--|
| 10.1 | The longer uncooked food has been at the market, the lower the quality.  |  |
| 10.2 | Improper handling of food by the seller could make people sick.          |  |
| 10.3 | Germs are on the skin, nose and mouth of everyone.                       |  |
| 10.4 | The cleanliness of sellers is important when I choose where to buy food. |  |
| 10.5 | Diarrhea can be transmitted through food.                                |  |
| 10.6 | I worry more about chemicals in the food than germs.                     |  |

### 11. Food safety practices (use "99" if respondent is not familiar with the cooking)

|       |                                                                                                                                                                         |     |
|-------|-------------------------------------------------------------------------------------------------------------------------------------------------------------------------|-----|
| 11.1  | For the most recent consumption, how long was the tomato/fish/poultry meat kept in your house before preparing? ( <i>enumerator to indicate whether hours or days</i> ) |     |
| 11.1a | <b>If &gt;1 hour</b> , Where/how do you store the uncooked tomato/fish/poultry meat at home? (1=Refrigerator, 2=ambient temperature, 3= Other )                         |     |
| 11.2  | Did you wash the product before preparation? (1=Yes, 0=No)                                                                                                              |     |
| 11.3  | Did you chop or cut the product before preparation? (1=Yes, 0=No)                                                                                                       |     |
| 11.4  | Did you cook the product? (1=Yes, 0=No)                                                                                                                                 |     |
| 11.4a | <b>(If yes)</b> How long (minutes)?                                                                                                                                     | Min |
| 11.5  | Which dishes do you often prepare from this product? ( <b>specify all that apply:</b> 1=salad, 2=roast, 3=fry, 4=grill, 5=boiled/soup, 6=stew/curry, 7=other)           |     |
| 11.6  | In general, do you use the same <b>knives</b> for both cooked and raw products, such as salad vegetables? (1=Yes, 0=No)                                                 |     |
| 11.7  | Do you wash knives between use? (1=Yes, 0=No)                                                                                                                           |     |
| 11.8  | Do you use the same <b>cutting boards</b> for both cooked and raw products, such as salad vegetables? (1=Yes, 0=No)                                                     |     |
| 11.9  | Do you wash cutting boards between use? (1=Yes, 0=No)                                                                                                                   |     |
| 11.10 | Do you wash your hands <i>with soap</i> before handling food. (1=Yes, 0=No)                                                                                             |     |
| 11.11 | Do you wash your hands <i>with soap</i> after handling raw meat/fish. (1=Yes, 0=No)                                                                                     |     |

### 12. Food safety and the home: storage and leftovers

|      |                                                                 |                                          |
|------|-----------------------------------------------------------------|------------------------------------------|
|      | <i>Do you agree with the following:</i>                         | agree=1,<br>disagree=0/<br>Don't know=99 |
| 12.1 | Improper food storage is dangerous to health.                   |                                          |
| 12.2 | Raw fish and meat should be stored in a cold place.             |                                          |
| 12.3 | Germs can get into food from insects and pests.                 |                                          |
| 12.4 | I can tell by the look and smell of food if it is safe to eat.  |                                          |
| 12.5 | High temperature or freezing is a safe method to destroy germs. |                                          |

Questionnaire number:

|      |                                                                         |  |
|------|-------------------------------------------------------------------------|--|
| 12.6 | I sometimes worry about eating leftovers because they can make me sick. |  |
| 12.7 | I always cook leftovers again before eating them.                       |  |
